# Supplementary material for: Modeling Within-Host Effects of Drugs on Plasmodium falciparum Transmission and Prospects for Malaria Elimination
Source: PLOS journal article supplement (doi:10.1371/journal.pcbi.1003434), 2014-01-23

Figure S2

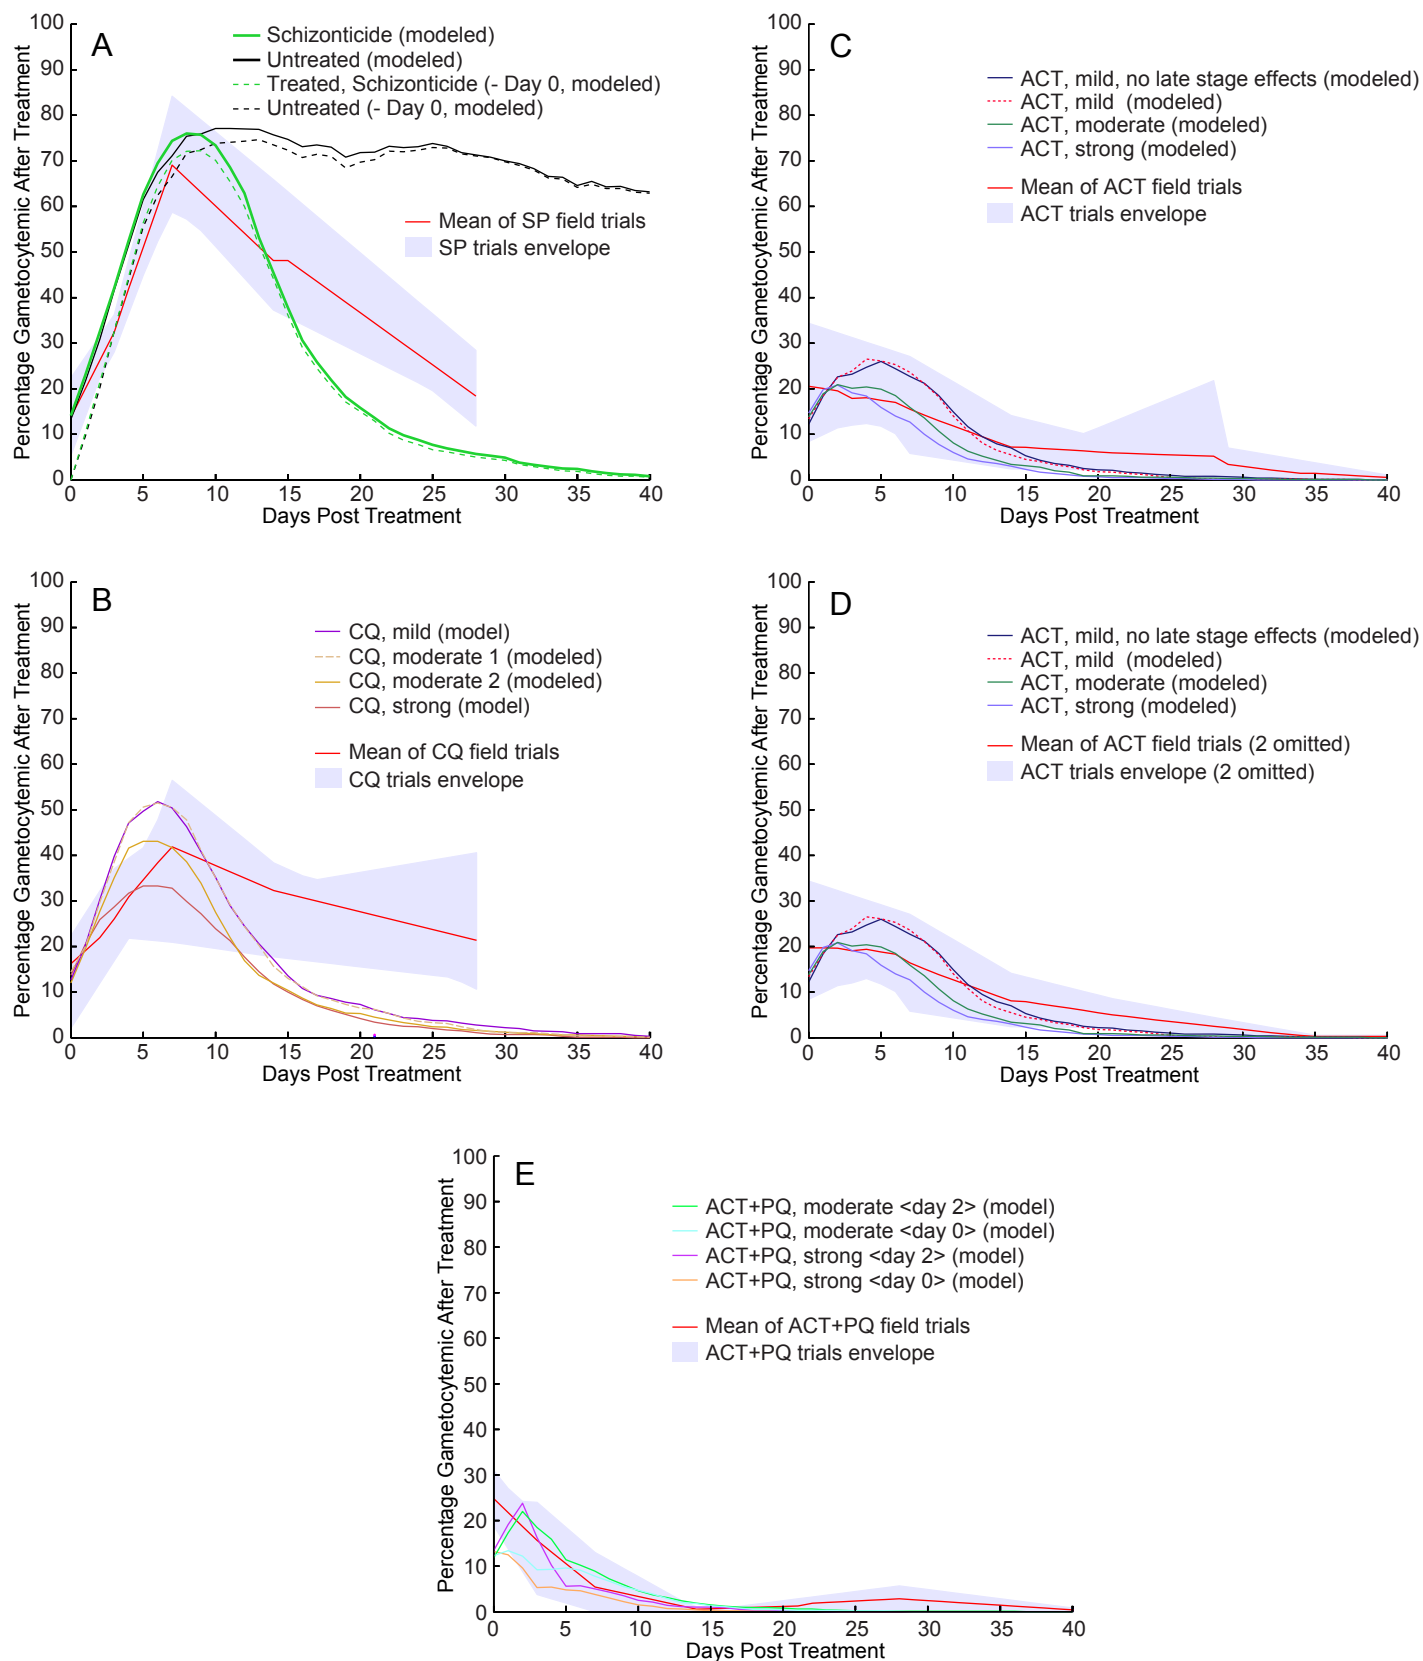

Supplement: S3 (10.1371/journal.pcbi.1003434.s003) [file journal.pcbi.1003434.s003]
